# Supplementary material
Source: publisher figshare collection journal article supplement (https://tandf.figshare.com/articles/dataset/_/22199555)
Supplement: Supplementary file 1 [file 1]

Archive with 2 entries (2 files):
- ieds_a_2181340_sm2521.pdf
- ieds_a_2181340_sm2520.pdf
