# Supplementary material
Source: publisher figshare collection journal article supplement (https://tandf.figshare.com/articles/dataset/_/22199555)
Supplement: Supplementary file 1 [file 1 › ieds_a_2181340_sm2520.pdf]

## Supplementary File S1

**Supplementary Figure S1.** Number of questionnaires completed per participant. Histograms with boxplots (minimum, interquartile range, median, maximum and outliers: indicated by dots) of number of questionnaires that were filled out during the study by male and female patients.

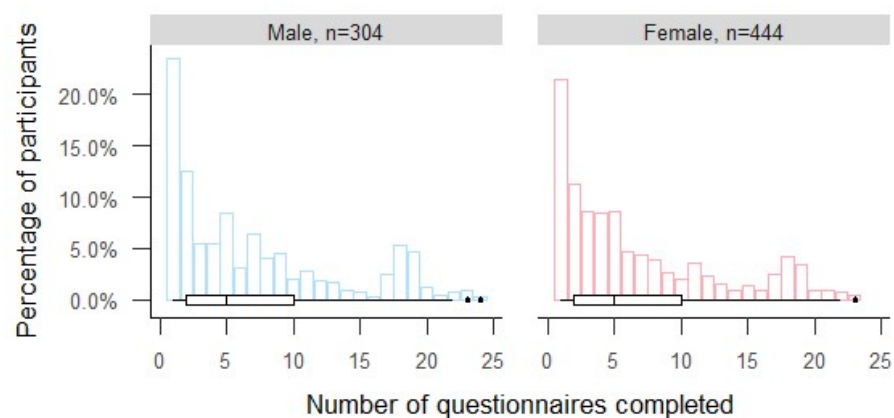

**Supplementary Table S1.** Differences in percentage of reported ADRs calculated for each sex.

| Similarly reported ADRs (PT)         | Male (%) | Female (%) | Absolute difference | P-value        |
|--------------------------------------|----------|------------|---------------------|----------------|
| Therapeutic product effect decreased | 5.2      | 3.7        | 1.5                 | 0.574          |
| Sinusitis                            | 0.9      | 2.8        | 1.9                 | 0.445          |
| Rhinorrhoea                          | 0.0      | 1.6        | 1.6                 | 0.310          |
| Rheumatoid arthritis                 | 0.0      | 2.4        | 2.4                 | 0.183          |
| Respiratory tract irritation         | 0.0      | 1.6        | 1.6                 | 0.310          |
| Respiratory tract infection          | 0.9      | 3.7        | 2.8                 | 0.230          |
| Rash pruritic                        | 0.0      | 1.6        | 1.6                 | 0.310          |
| Pyrexia                              | 0.9      | 3.3        | 2.4                 | 0.259          |
| Psoriasis                            | 0.9      | 2.0        | 1.1                 | 0.420          |
| Pruritus                             | 7.8      | 4.9        | 2.9                 | 0.335          |
| Pneumonia                            | 3.4      | 5.7        | 2.3                 | 0.445          |
| Pain in extremity                    | 3.4      | 2.0        | 1.4                 | 0.476          |
| Nausea                               | 1.7      | 4.9        | 3.2                 | 0.241          |
| Nasopharyngitis                      | 6.0      | 6.5        | 0.5                 | 1.000          |
| Injection site rash                  | 0.0      | 1.6        | 1.6                 | 0.310          |
| Injection site pruritus              | 3.4      | 13.0       | 9.6                 | <b>0.004**</b> |
| Injection site pain                  | 16.4     | 17.1       | 0.7                 | 1.000          |
| Injection site irritation            | 3.4      | 0.9        | 2.5                 | 0.086          |
| Injection site inflammation          | 1.7      | 7.3        | 5.6                 | <b>0.028*</b>  |
| Injection site haematoma             | 0.9      | 6.9        | 6.0                 | <b>0.017*</b>  |
| Injection site erythema              | 2.6      | 8.9        | 6.3                 | <b>0.026*</b>  |
| Influenza like illness               | 2.6      | 3.7        | 1.1                 | 0.759          |
| Infection susceptibility increased   | 3.4      | 3.3        | 0.1                 | 1.000          |
| Hyperhidrosis                        | 0.0      | 1.6        | 1.6                 | 0.310          |
| Hot flush                            | 0.0      | 2.0        | 2.0                 | 0.181          |
| Herpes zoster                        | 0.0      | 2.0        | 2.0                 | 0.181          |
| Headache                             | 3.4      | 5.3        | 1.9                 | 0.597          |
| Haematoma                            | 0.0      | 4.9        | 4.9                 | <b>0.011*</b>  |
| Fatigue                              | 7.8      | 8.5        | 0.7                 | 1.000          |
| Eye inflammation                     | 0.9      | 2.4        | 1.5                 | 0.437          |
| Erythema                             | 0.0      | 1.6        | 1.6                 | 0.310          |
| Eczema                               | 2.6      | 1.6        | 1.0                 | 0.685          |
| Dyspnoea                             | 1.7      | 2.4        | 0.7                 | 1.000          |
| Dizziness                            | 0.9      | 1.6        | 0.7                 | 1.000          |
| Diarrhoea                            | 1.7      | 3.3        | 1.6                 | 0.512          |
| Cystitis                             | 0.9      | 5.7        | 4.7                 | <b>0.044*</b>  |
| Cough                                | 3.4      | 4.1        | 0.7                 | 1.000          |
| Arthralgia                           | 7.8      | 4.5        | 3.3                 | 0.222          |
| Aphthous ulcer                       | 0.9      | 1.6        | 0.7                 | 1.000          |
| Alopecia                             | 2.6      | 2.4        | 0.2                 | 1.000          |

P-values are the result of Fisher exact test before correction for multiple testing. OR=odds ratio, CI= confidence interval. PT= Preferred Term MedDRA. \*p-values <0.05. \*\*p-value <0.01.

**Supplementary Table S2.** Sex differences in burden.

|                                      | Male (n) | Female (n) | P     |
|--------------------------------------|----------|------------|-------|
| Arthralgia                           | 8        | 10         | 0.052 |
| Cough                                | 4        | 10         | 0.252 |
| Fatigue                              | 9        | 21         | 0.245 |
| Headache                             | 4        | 13         | 0.469 |
| Infection susceptibility increased   | 4        | 8          | 1.000 |
| Injection site pain                  | 18       | 42         | 0.116 |
| Injection site pruritus              | 4        | 31         | 0.981 |
| Nasopharyngitis                      | 7        | 15         | 0.698 |
| Pain in extremity                    | 4        | 5          | 1.000 |
| Pneumonia                            | 4        | 14         | 0.709 |
| Pruritus                             | 9        | 12         | 0.944 |
| Therapeutic product effect decreased | 6        | 9          | 0.066 |

N= number of male and female burden values examined in the analysis.

P-values are the results of Cochran-Armitage test for trend.
